# Supplementary material for: Genotype Diversity and Spread of White Spot Syndrome Virus (WSSV) in Madagascar (2012–2016)
Source: MDPI journal article supplement (doi:10.3390/v13091713), 2021-08-28
Supplement: s1 [file s1]

**Supplementary Table S1:** GenBank Accession number of variable loci (ORF125, ORF73/77, ORF93/96, VR14/15, VR23/24) DNA sequences of *white spot syndrome virus* (WSSV) strains isolated in Madagascar.

| Variable loci | Strain           | Length (bp) | GenBank Accession |
|---------------|------------------|-------------|-------------------|
| ORF125        | WSSV-MD-I-2012   | 721         | MZ327619          |
| ORF125        | WSSV-MD-II-2012  | 652         | MZ327620          |
| ORF125        | WSSV-MD-III-2014 | 583         | MZ327621          |
| ORF125        | WSSV-MD-IV-2016  | 792         | MZ327622          |
| ORF93-ORF96   | WSSV-MD-I-2012   | 348         | MZ327623          |
| ORF73-ORF77   | WSSV-MD-I-2012   | 1739        | MZ327624          |
| VR14/15       | WSSV-MD-I-2012   | 1850        | MZ327625          |
| VR23/24       | WSSV-MD-I-2012   | 1265        | MZ327626          |
